# Supplementary material for: Photo-responsive anti-fouling polyzwitterionic brushes: a mesoscopic simulation
Source: Royal Society of Chemistry journal article supplement (doi:10.1039/d4tb00899e), 2024-01-01
Supplement: d4tb00899e1.pdf [file d4tb00899e1.pdf]

## Electronic Supplementary Information

# Photo-responsive Anti-Fouling Polyzwitterionic Brushes: A Mesoscopic Simulation

*Zhaohong Miao, Jian Zhou\**

School of Chemistry and Chemical Engineering, Guangdong Provincial Key Lab for Green  
Chemical Product Technology, South China University of Technology, Guangzhou  
510640, P. R. China

\* Corresponding author E-mail: [jianzhou@scut.edu.cn](mailto:jianzhou@scut.edu.cn) (J. Zhou.)

## Content

**Table S1** Repulsive parameters  $a_{ij}$  between different beads of TFC film and protein

**Table S2** The dielectric constants of systems

**Fig. S1** Water distribution in the simulation box of  $A_{63}B_{10}C_{40}$  systems under *vis* light exposure, with  $D = 0.160$  **(a)**,  $0.230$  **(b)** and  $0.314$  **(c)**, respectively.

**Fig. S2** RMSD profiles of brushes from *vis* light exposure to UV exposure with  $D = 0.230$ , in  $A_{63}B_{10}C_{40}$  system **(a)** and  $A_{63}B_{10}C_{70}$  system **(b)**.

**Table S1** Repulsive parameters  $a_{ij}$  between different beads of TFC film and protein (blue: the polar amino acid; orange: the moderate polar amino acid; red: the hydrophobic amino acid)

| Type<br>$a_{ij}$ | A      | Average B | Average C | Average C2 | Average F | Average |        |        |        |        |
|------------------|--------|-----------|-----------|------------|-----------|---------|--------|--------|--------|--------|
| ASP              | 101.74 | 102.45    | 110.13    | 109.62     | 103.36    | 100.17  | 129.49 | 136.12 | 104.41 | 106.94 |
| GLU              | 99.59  |           | 108.91    |            | 90.89     |         | 145.16 |        | 107.83 |        |
| LYS              | 111.97 |           | 106.62    |            | 98.05     |         | 147.68 |        | 114.01 |        |
| ARG              | 101.81 |           | 106.84    |            | 114.26    |         | 123.58 |        | 103.02 |        |
| SER              | 114.80 |           | 123.07    |            | 119.07    |         | 132.18 |        | 118.27 |        |
| THR              | 86.15  |           | 97.28     |            | 98.69     |         | 144.82 |        | 111.02 |        |
| PRO              | 100.97 |           | 110.85    |            | 98.42     |         | 124.38 |        | 106.87 |        |
| ASN              | 99.62  |           | 106.83    |            | 94.42     |         | 138.08 |        | 105.19 |        |
| GLN              | 105.42 |           | 116.01    |            | 84.41     |         | 139.74 |        | 91.83  |        |
| ALA              | 91.61  | 95.09     | 102.27    | 102.22     | 107.12    | 98.17   | 152.79 | 137.87 | 114.57 | 109.32 |
| GLY              | 94.25  |           | 107.19    |            | 105.27    |         | 128.20 |        | 115.19 |        |
| CYS              | 77.01  |           | 87.08     |            | 96.36     |         | 134.51 |        | 110.71 |        |
| HIS              | 107.11 |           | 109.95    |            | 90.19     |         | 137.53 |        | 96.24  |        |
| TYR              | 105.48 |           | 104.62    |            | 91.90     |         | 136.34 |        | 109.91 |        |

|     |        |        |        |        |        |       |        |        |        |        |
|-----|--------|--------|--------|--------|--------|-------|--------|--------|--------|--------|
| ILE | 101.92 | 102.72 | 110.88 | 108.53 | 97.00  | 92.71 | 128.93 | 140.84 | 106.92 | 107.09 |
| LEU | 97.21  |        | 110.36 |        | 93.74  |       | 155.11 |        | 106.78 |        |
| VAL | 110.13 |        | 113.98 |        | 102.19 |       | 146.20 |        | 98.78  |        |
| PHE | 102.11 |        | 106.52 |        | 87.88  |       | 145.56 |        | 108.92 |        |
| MET | 94.79  |        | 104.81 |        | 85.60  |       | 142.06 |        | 110.44 |        |
| TRP | 110.19 |        | 104.62 |        | 89.86  |       | 127.19 |        | 110.70 |        |

---

**Table S2 (a)** The dielectric constants of the systems with  $D = 0.160$ ,  $R = 0.136$ ,  $L = 4 / 7$

| $\epsilon_r$         | type    |         |
|----------------------|---------|---------|
|                      | SP-form | MC-form |
| $A_{63}B_{10}C_{40}$ | 2.501   | 29.061  |
| $A_{63}B_{10}C_{70}$ | 2.397   | 39.225  |

---

**Table S2 (b)** The dielectric constants of the systems with  $D = 0.230$ ,  $R = 0.068, 0.136, 0.205$ ,  $L = 4 / 7$

| $\epsilon_r$      | type    |         |
|-------------------|---------|---------|
|                   | SP-form | MC-form |
| $A_{68}B_5C_{20}$ | 2.424   | 18.592  |
| $A_{68}B_5C_{35}$ | 2.366   | 26.766  |

|                                                  |       |        |
|--------------------------------------------------|-------|--------|
| A <sub>63</sub> B <sub>10</sub> C <sub>40</sub>  | 2.349 | 29.013 |
| A <sub>63</sub> B <sub>10</sub> C <sub>70</sub>  | 2.277 | 39.218 |
| A <sub>58</sub> B <sub>15</sub> C <sub>60</sub>  | 2.297 | 36.324 |
| A <sub>58</sub> B <sub>15</sub> C <sub>105</sub> | 2.223 | 46.801 |

**Table S2 (c)** The dielectric constants of the systems with D = 0.314, R = 0.136, L = 4 / 7

| $\epsilon_r$                                    | type    |         |
|-------------------------------------------------|---------|---------|
|                                                 | SP-form | MC-form |
| A <sub>63</sub> B <sub>10</sub> C <sub>40</sub> | 2.257   | 28.984  |
| A <sub>63</sub> B <sub>10</sub> C <sub>70</sub> | 2.204   | 39.214  |

According to the work of Yang *et al.*<sup>1</sup>, the dielectric constants were listed in Table S2. To reflect  $\epsilon_r$  in P(ACN-*r*-BBEM)-*g*-SPMA and BSA systems, there was a reasonable approximation to estimate it according to molecular structure. Namely,  $\epsilon_r$  is related to the number of hydrophobic and hydrophilic beads in the coarse-grained model. The hydrophobic beads are mainly composed of alkanes with  $\epsilon_r$  about 2.0. The hydrophilic beads are soluble in water surrounded by water beads, therefore,  $\epsilon_r$  can be set as 78.0 (dielectric constant of water at the room temperature). Thus, the system  $\epsilon_r$  can be expressed as:

$$\epsilon_r = \frac{n_{\text{hydrophilic}} * 78.0 + n_{\text{hydrophobic}} * 2}{n_{\text{hydrophilic}} + n_{\text{hydrophobic}}}$$

where  $n_{\text{hydrophilic}}$  means the total number of hydrophilic beads of polymers in the system, and  $n_{\text{hydrophobic}}$  means the total number of hydrophobic beads of polymers in the system.

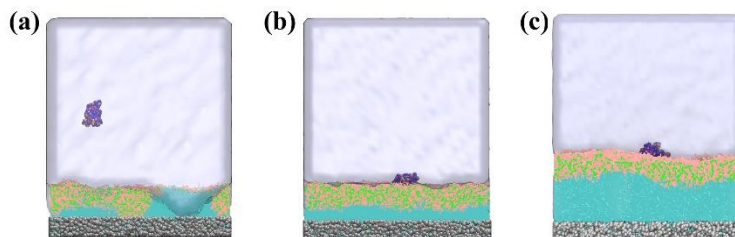

**Fig. S1** Water distribution in the simulation box of  $A_{63}B_{10}C_{40}$  systems under *vis* light exposure, with  $D = 0.160$  (a),  $0.230$  (b),  $0.314$  (c), respectively.

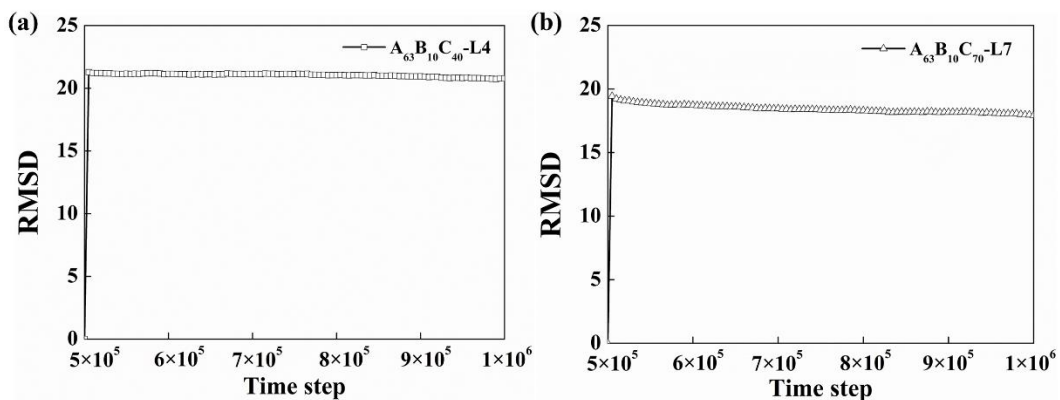

**Fig. S2** RMSD profiles of brushes from *vis* light exposure to UV exposure with  $D = 0.230$ , in  $A_{63}B_{10}C_{40}$  system (a) and  $A_{63}B_{10}C_{70}$  system (b).

In Fig. S2, RMSD data of brushes from the SP form to the MC form in system of  $A_{63}B_{10}C_{40}$  are shown. As light switches from *vis* to UV, in the first  $1 \times 10^5$  steps, the RMSD curve rises sharply, namely, the conformation of brushes changes obviously. Under *vis* exposure, the chain with SP form is in a shrank state and the size is smaller; when

experiencing UV radiation, the chain swells apparently and the size increases obviously. Those results confirm the reasonability of the  $R_g^2$  data of system  $A_{63}B_{10}C_{40}$ , as well as explain the thickening of the selective layer. Namely, the swelling hydrophilic selective layer can supply a strong mechanical push to remove the foulant. Fig. S2b displays the RMSD data of  $A_{63}B_{10}C_{70}$  system. Although the RMSD curve also rises sharply in the first  $1 \times 10^5$  steps, the equilibrium value is slightly less than that of  $A_{63}B_{10}C_{40}$  system. That is, the conformation stability of chain in  $A_{63}B_{10}C_{70}$  system is higher than that of  $A_{63}B_{10}C_{40}$  system. The longer brush-hair causes a stronger steric-hindrance effect to limit the deformation of brushes and creates a tighter hydration layer when experiencing UV radiation. Therefore, the  $R_g^2$  values in  $A_{63}B_{10}C_{70}$  system shows opposite change trend compared with those in  $A_{63}B_{10}C_{40}$  system. While the antifouling ability of the system become enhanced.

#### REFERENCE

1. Yang, S. C.; Zhu, Y. L.; Qian, H. L.; Lü, Z. Y. Molecular dynamics simulation of antipolyelectrolyte effect and solubility of polyelectrolytes. *Chem Res Chinese U* **2017**, 33 (2), 261-267 DOI: 10.1007/s40242-017-6354-0.
